# Supplementary material
Source: MDPI journal article supplement (https://www.mdpi.com/2571-6255/2/3/49)
Supplement: s1 [file s1]

Table S1. Number or average value of destroyed and survived structures within building inspection classes for three California regions

| Variable            | Bay Area                            |                     | North-Interior     |                     | Southern           |                     |                    |
|---------------------|-------------------------------------|---------------------|--------------------|---------------------|--------------------|---------------------|--------------------|
|                     | Category                            | Number<br>destroyed | Number<br>survived | Number<br>destroyed | Number<br>survived | Number<br>destroyed | Number<br>survived |
| Defensible<br>space |                                     |                     |                    |                     |                    |                     |                    |
|                     | 0-29                                | 7523                | 779                | 17234               | 832                | 2472                | 537                |
|                     | 30-59                               | 1235                | 154                | 237                 | 19                 | 283                 | 73                 |
|                     | 60-99                               | 519                 | 79                 | 2341                | 31                 | 219                 | 38                 |
|                     | 100+                                | 201                 | 92                 | 472                 | 33                 | 67                  | 14                 |
|                     | Average                             | 24.32               | 31.81              | 24.60               | 21.26              | 24.32               | 23.87              |
|                     |                                     |                     |                    |                     |                    |                     |                    |
| Roof type 1         | Asphalt                             | 30                  | 36                 | 16362               | 692                | 448                 | 77                 |
|                     | Concrete                            |                     |                    | 118                 | 13                 | 32                  | 14                 |
|                     | Metal                               | 24                  | 50                 | 3356                | 205                | 235                 | 35                 |
|                     | Tile                                | 1                   | 11                 | 403                 | 66                 | 331                 | 70                 |
|                     | Wood                                | 5                   | 1                  | 143                 | 7                  | 25                  | 3                  |
|                     |                                     |                     |                    |                     |                    |                     |                    |
| Roof type 2         | Combustible                         | 908                 | 107                | 252                 | 13                 | 169                 | 19                 |
|                     | Resistant                           | 8067                | 983                | 1458                | 83                 | 1728                | 417                |
| Exterior<br>siding  | Combustible                         | 4578                | 565                | 13843               | 449                | 1115                | 184                |
|                     | Resistant                           | 4042                | 627                | 8158                | 638                | 1872                | 453                |
| Eaves               |                                     |                     |                    |                     |                    |                     |                    |
|                     | Enclosed                            | 900                 | 364                | 2562                | 318                | 307                 | 243                |
|                     | None                                | 15                  | 31                 | 1934                | 114                | 197                 | 46                 |
| Window<br>panes     | Unenclosed                          | 1169                | 654                | 9731                | 627                | 510                 | 302                |
|                     |                                     |                     |                    |                     |                    |                     |                    |
|                     | Multi                               | 3489                | 751                | 9913                | 716                | 679                 | 396                |
| Vent screen         | None                                | 9                   | 33                 | 1776                | 117                | 81                  | 18                 |
|                     | Single                              | 1842                | 240                | 8085                | 234                | 831                 | 190                |
|                     |                                     |                     |                    |                     |                    |                     |                    |
|                     | Fine<br>(Screened)                  | 4                   | 16                 | 4935                | 343                | 98                  | 49                 |
|                     | Mesh<br>Screen > 1/8"<br>(Screened) | 10                  | 8                  | 9002                | 362                | 90                  | 45                 |
|                     | No<br>(Unscreened)                  | 261                 | 104                | 59                  | 9                  | 156                 | 72                 |
|                     | None                                | 13                  | 73                 | 2795                | 233                | 148                 | 82                 |
|                     | Screened                            | 3933                | 637                | 362                 | 49                 | 504                 | 253                |
| Unscreened          | 92                                  | 20                  | 587                | 55                  | 55                 | 22                  |                    |

|                                 |             |      |     |       |       |       |       |
|---------------------------------|-------------|------|-----|-------|-------|-------|-------|
| <i>Deck,<br/>Porch material</i> | Composite   | 333  | 87  | 89    | 12    | 26    | 16    |
|                                 | Masonry     | 1939 | 254 | 8348  | 464   | 681   | 172   |
|                                 | Wood        | 1927 | 335 | 3705  | 145   | 511   | 145   |
|                                 | None        | 32   | 75  | 8907  | 405   | 549   | 126   |
| <i>Topography</i>               | Chimney     | 121  | 14  | 225   | 13    | 88    | 14    |
|                                 | Flat Ground | 4861 | 419 | 8276  | 408   | 1020  | 134   |
|                                 | Ridge Top   | 841  | 147 | 2601  | 139   | 414   | 117   |
|                                 | Saddle      | 70   | 9   | 237   | 8     | 40    | 7     |
|                                 | Slope       | 4404 | 580 | 7886  | 313   | 1594  | 370   |
|                                 |             |      |     |       |       |       |       |
| <i>Defensive<br/>Action</i>     | Both        |      |     | 20    | 11    | 9     | 1     |
|                                 | Civilian    |      |     | 100   | 31    | 12    | 8     |
|                                 | Fire        |      |     | 121   | 164   | 32    | 13    |
|                                 | Department  |      |     |       |       |       |       |
|                                 | Unknown     |      |     | 10258 | 442   | 916   | 121   |
| <i>Home age</i>                 |             |      |     |       |       |       |       |
|                                 | Average     |      |     | 49.92 | 41.62 | 47.13 | 41.72 |

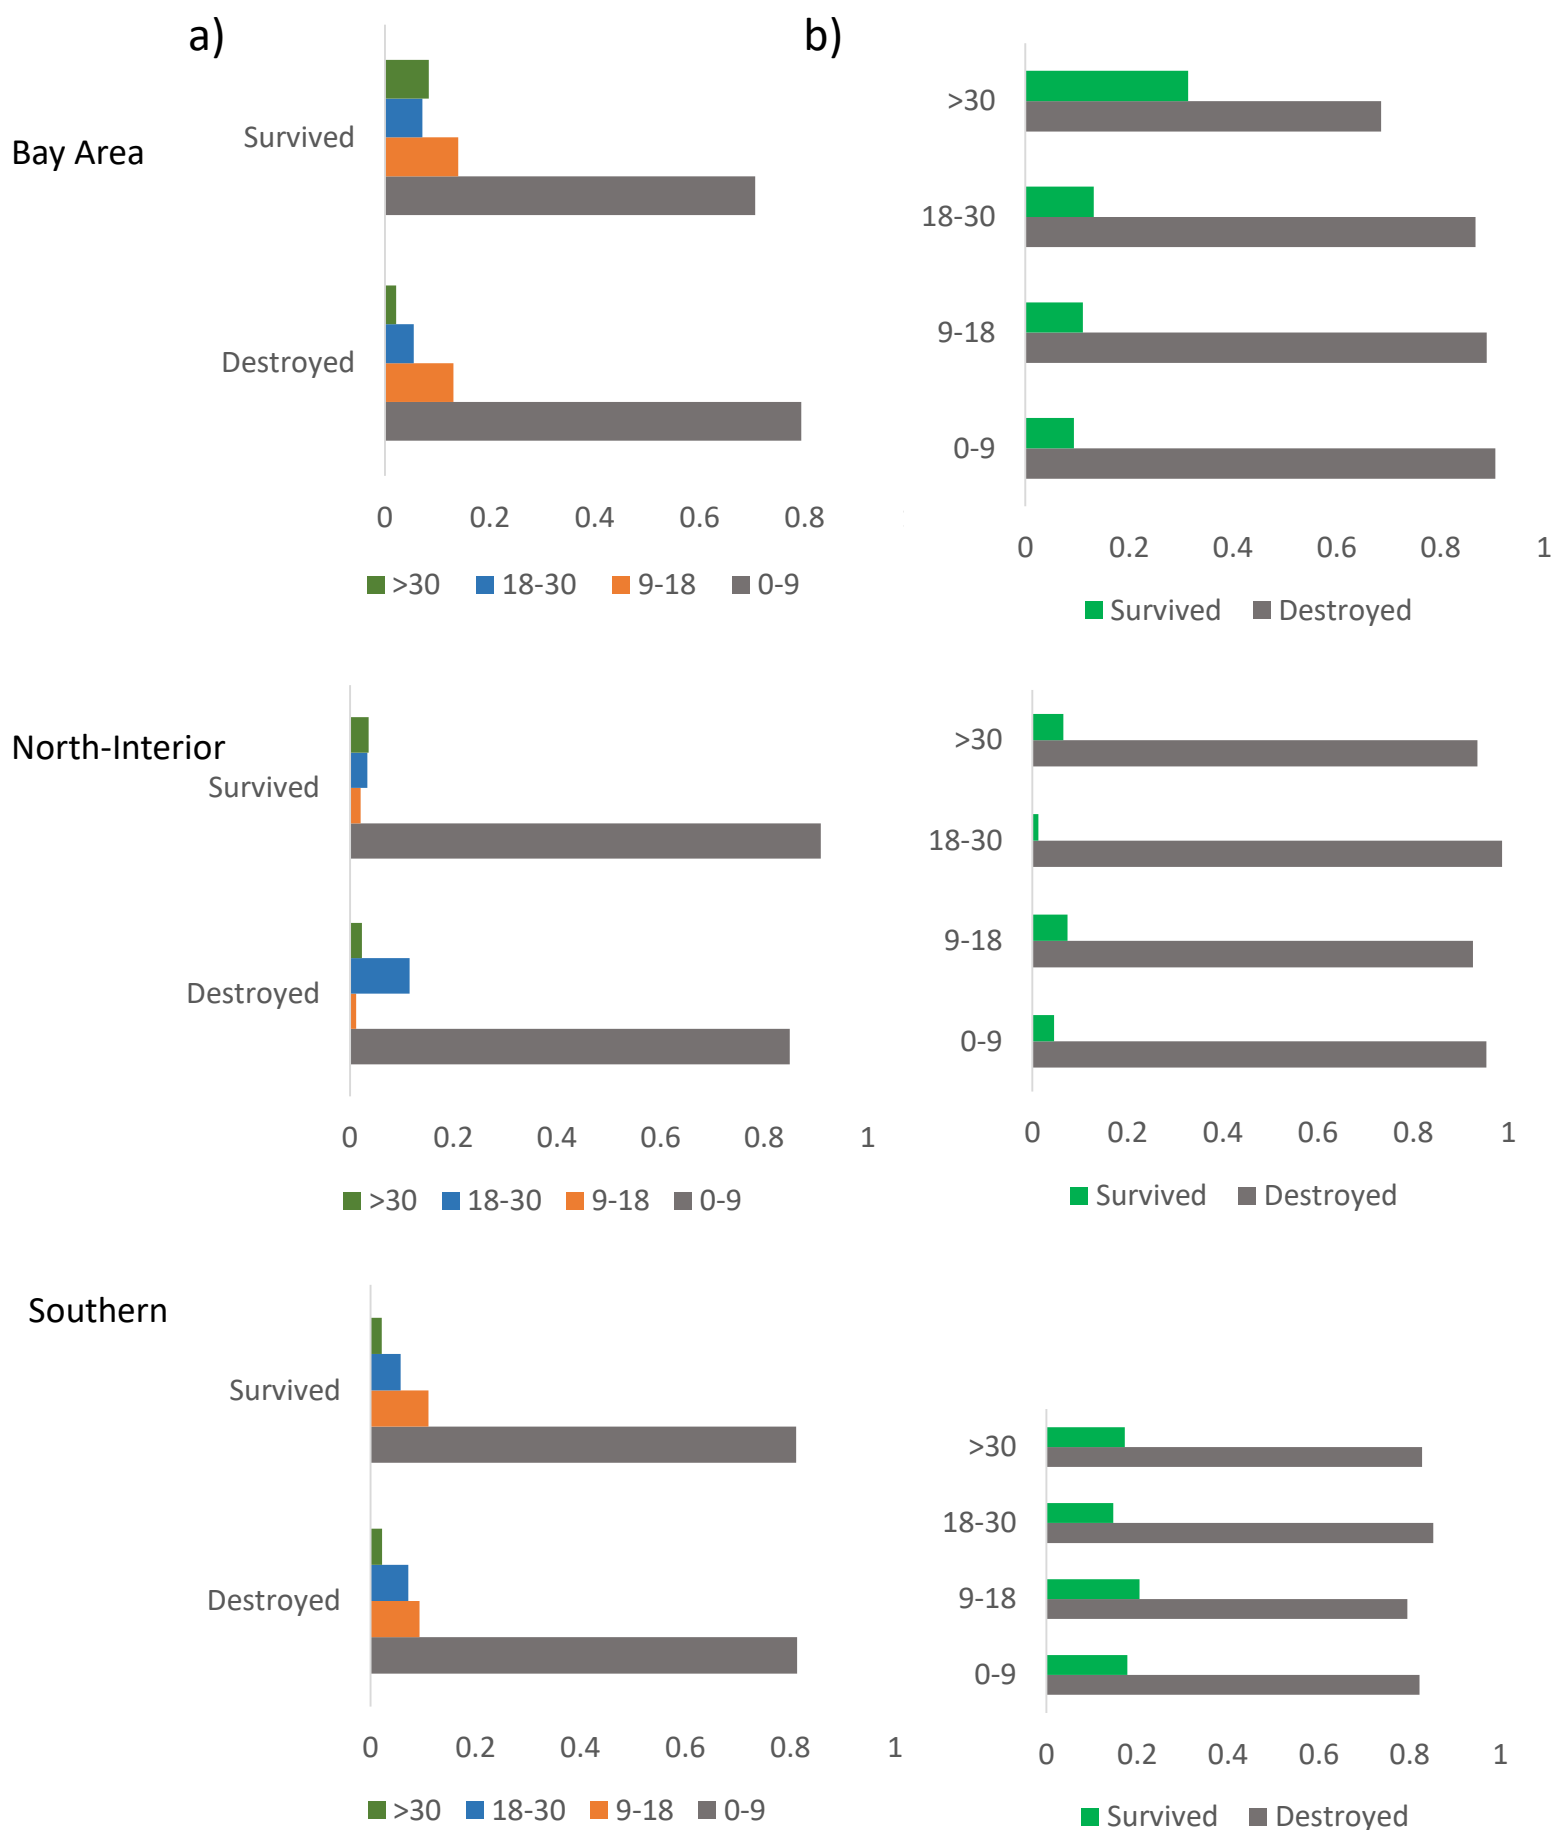

Figure S1: Proportion of defensible space distance classes for survived and destroyed structures (a) and proportion of survived and destroyed structures within defensible space distance classes (b) for three California regions.

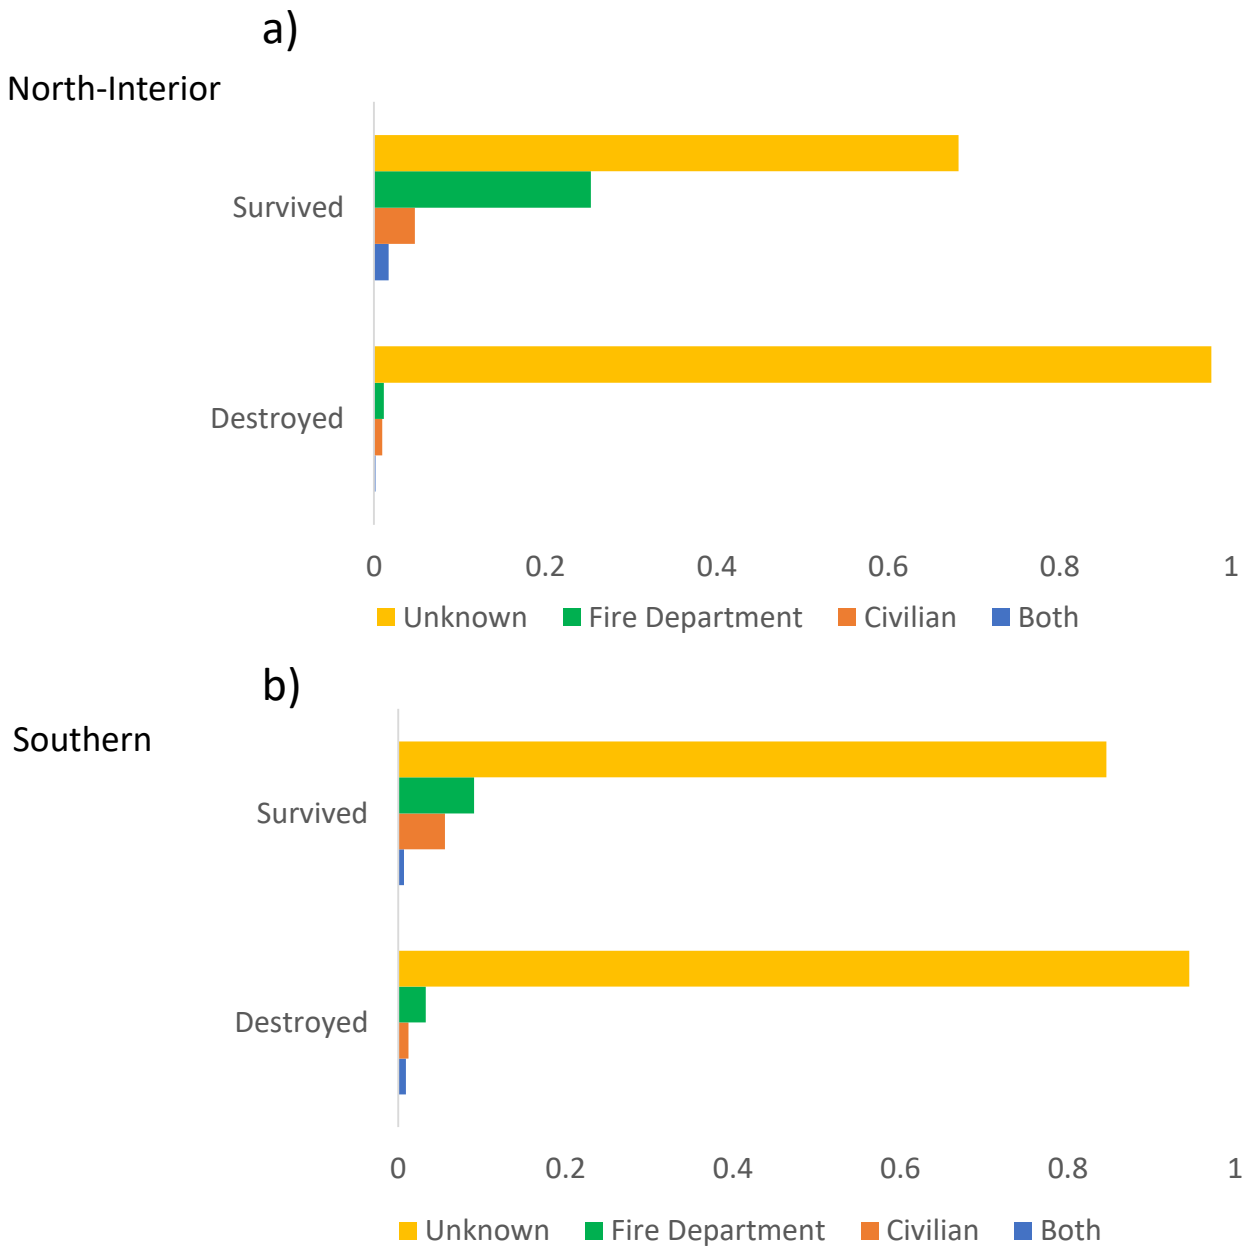

Figure S2: Proportion of defensible action type for survived and destroyed structures (a) and proportion of survived and destroyed structures within defensive action types (b) for two California regions.

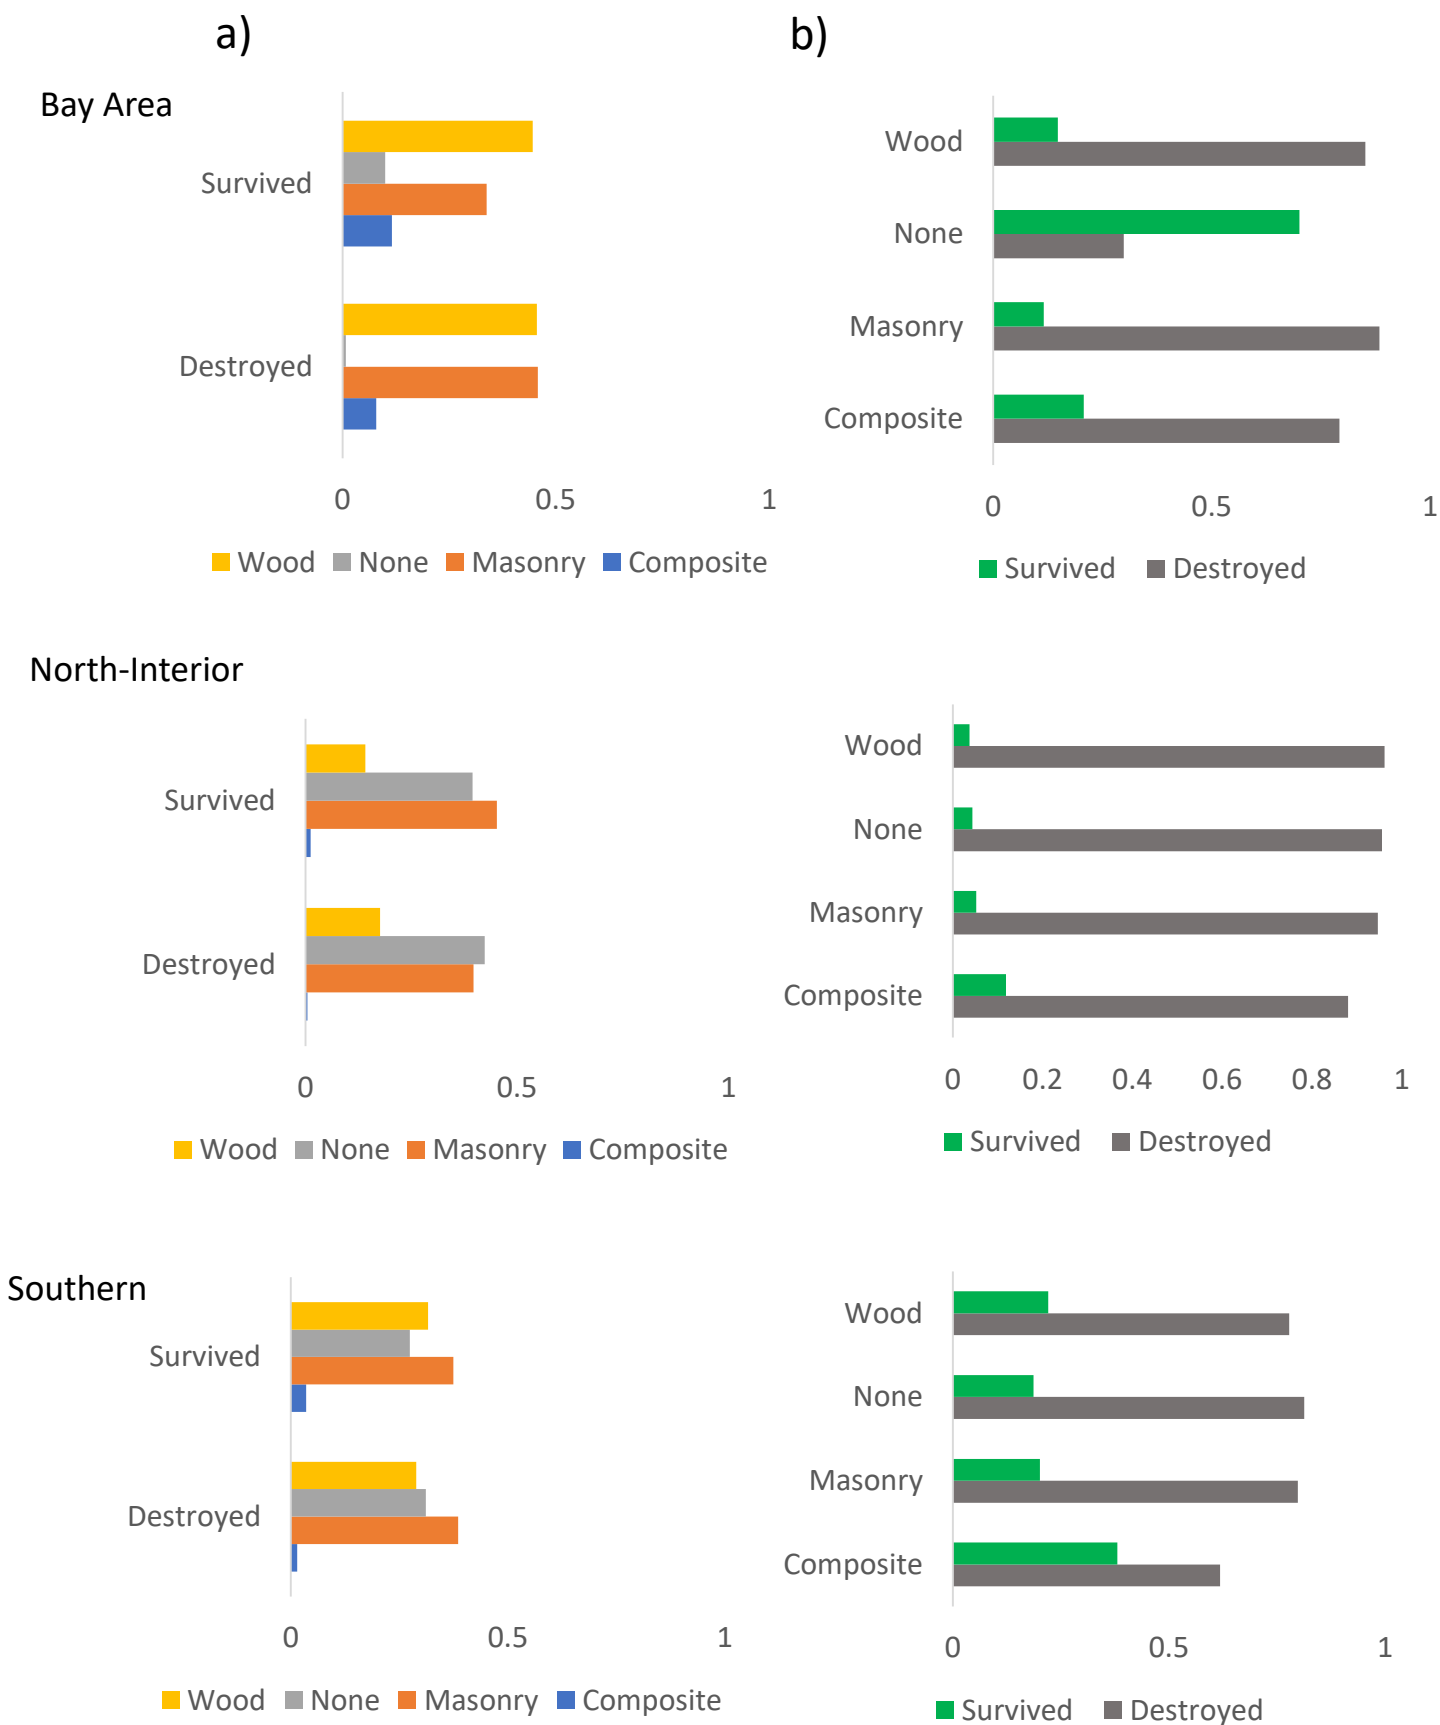

Figure S3: Proportion of deck material type for survived and destroyed structures (a) and proportion of survived and destroyed structures within deck material type classes (b) for three California regions.

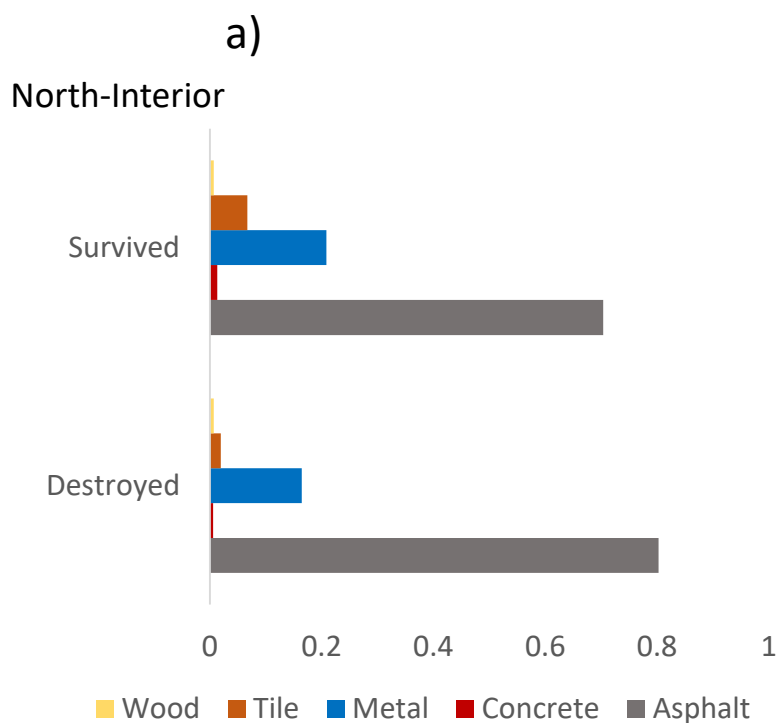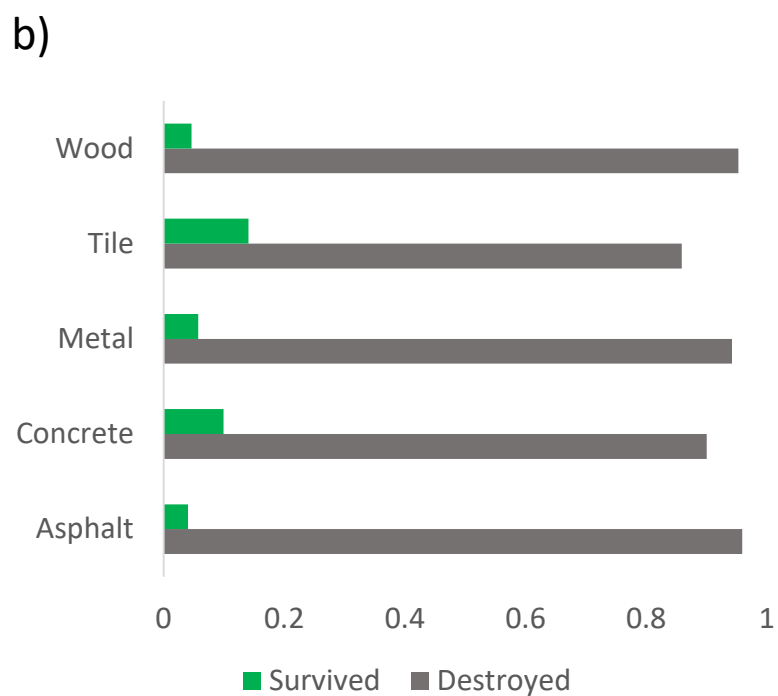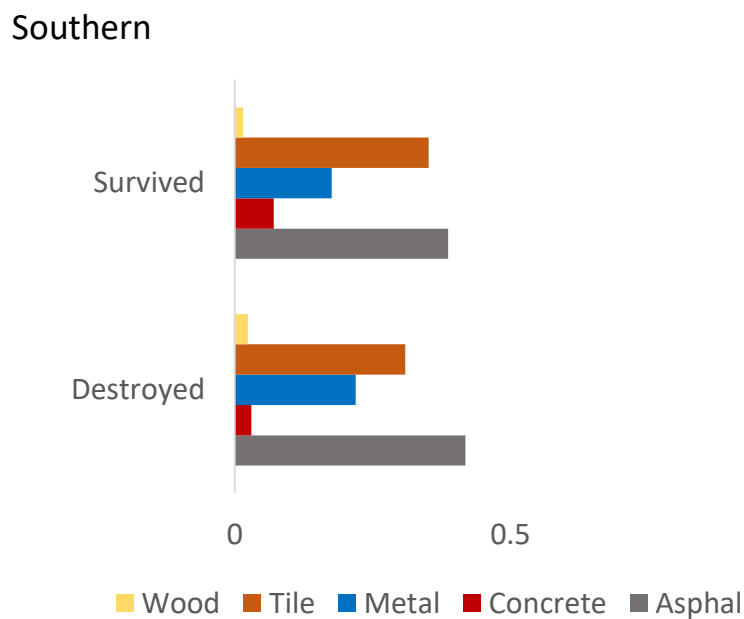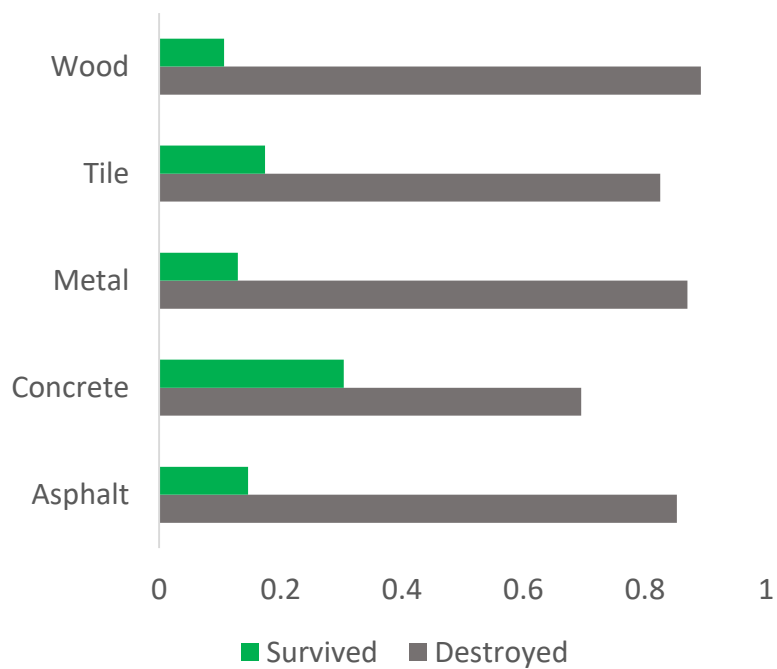

Figure S4: Proportion of roof material type for survived and destroyed structures (a) and proportion of survived and destroyed structures within roof material type classes (b) for two California regions.

## Bay Area a)

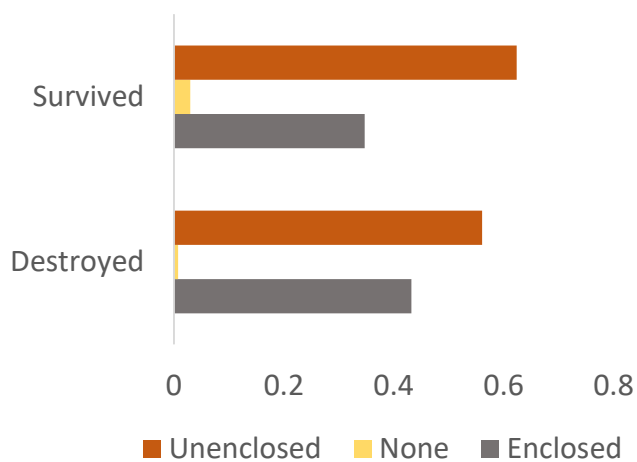

## b)

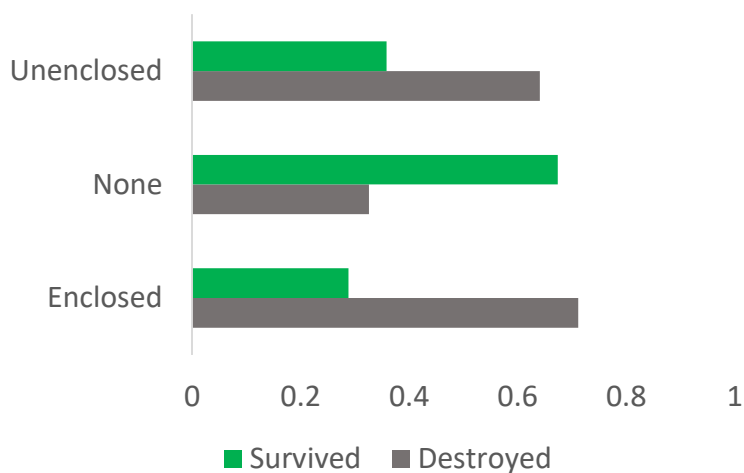

## North-Interior

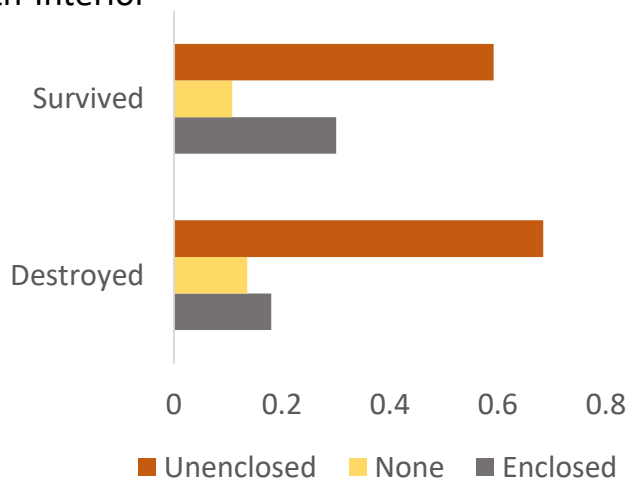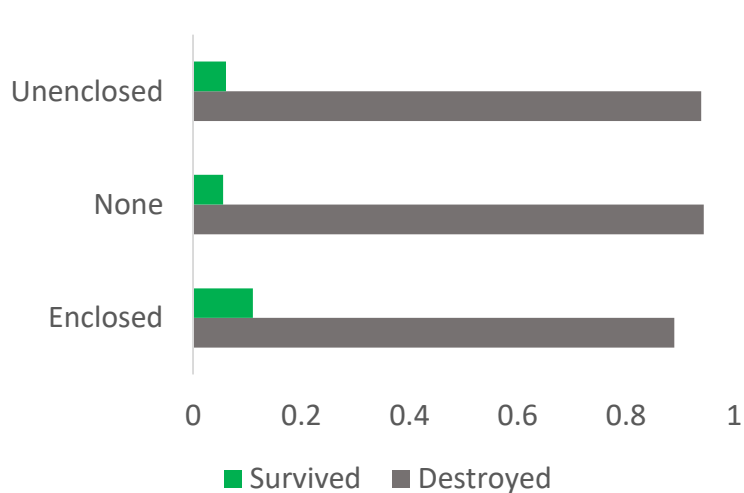

## Southern

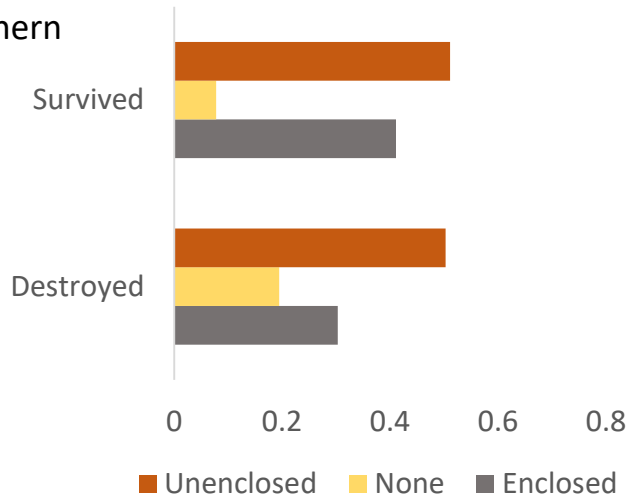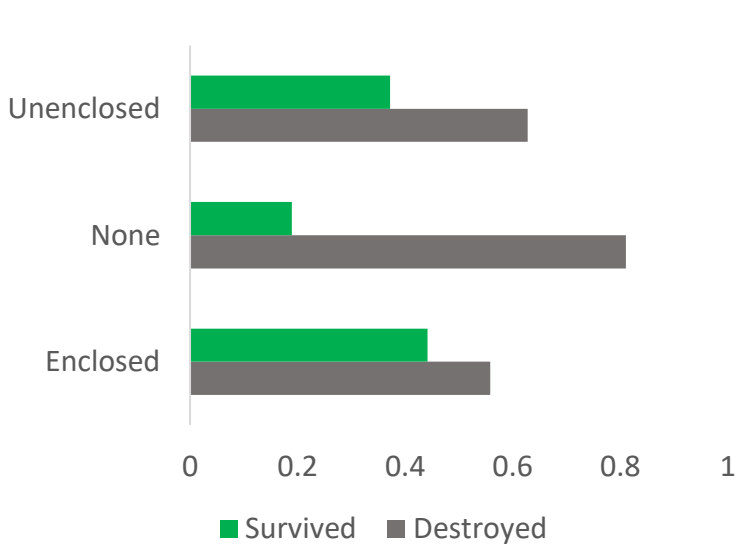

Figure S5: Proportion of eave type for survived and destroyed structures (a) and proportion of survived and destroyed structures within eave type classes (b) for three California regions.

a)

b)

Bay Area

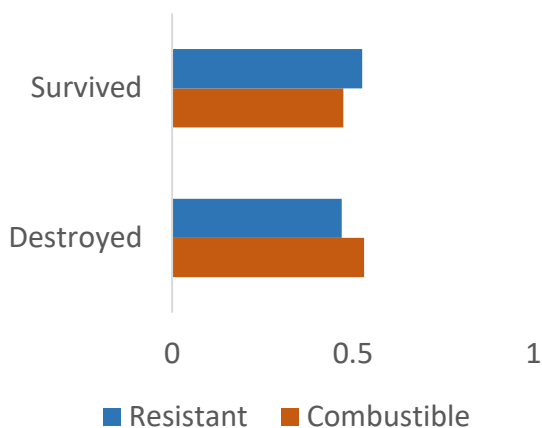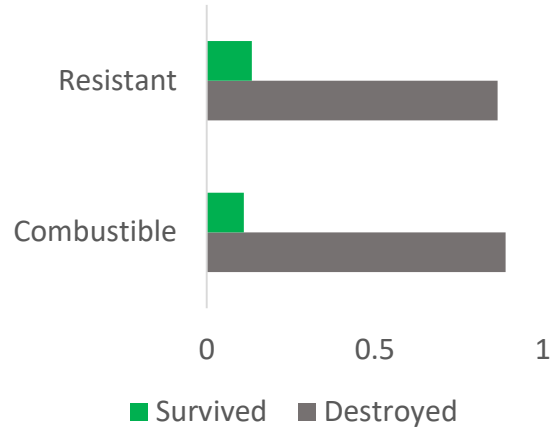

North-Interior

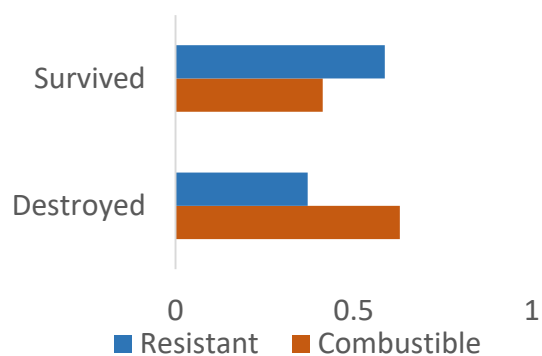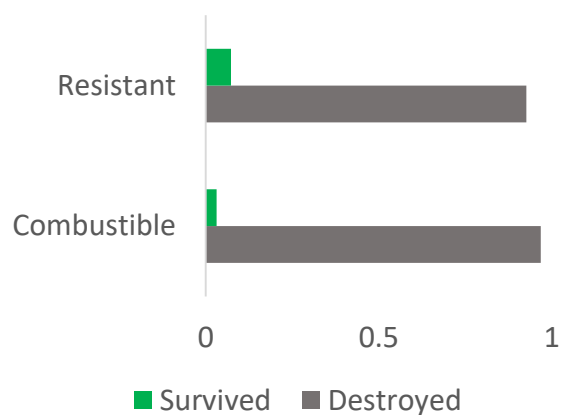

Southern

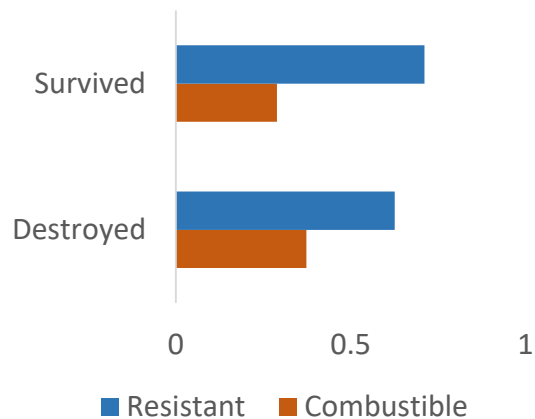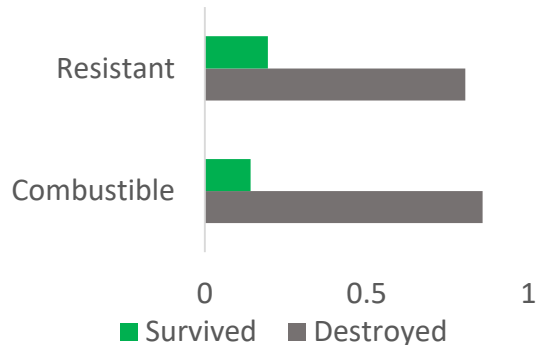

Figure S6: Proportion of Exterior siding classes for survived and destroyed structures (a) and proportion of survived and destroyed structures within exterior siding classes (b) for three California regions.

a)

Bay Area

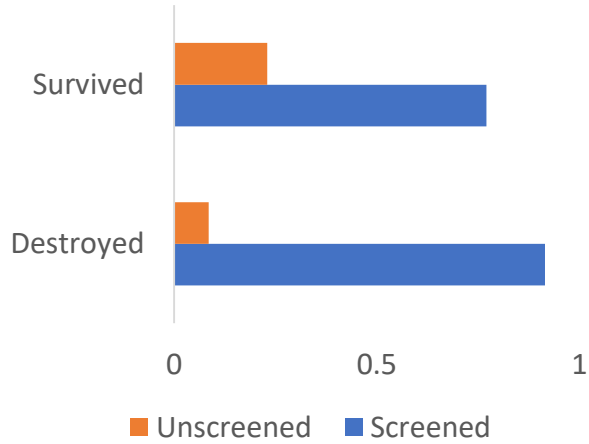

b)

Unscreened

Screened

Survived Destroyed

North-Interior

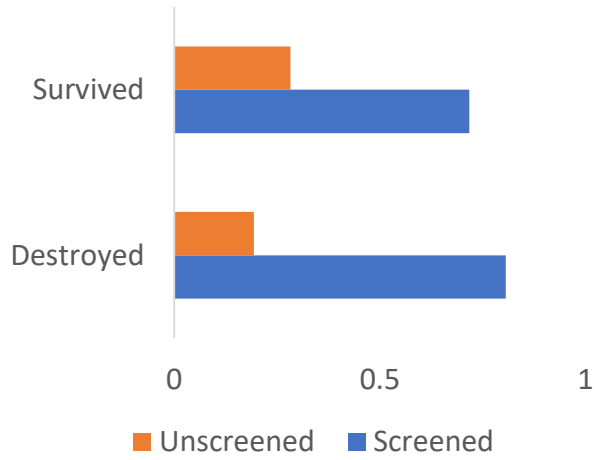

Unscreened

Screened

Survived Destroyed

Southern

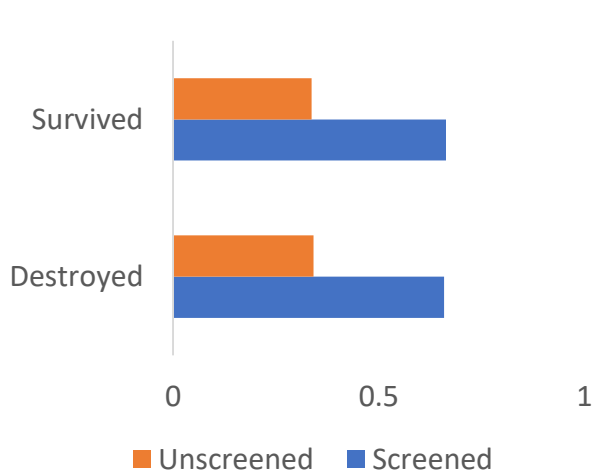

Unscreened

Screened

Survived Destroyed

Figure S7: Proportion of vent screen classes for survived and destroyed structures (a) and proportion of survived and destroyed structures within vent screen classes (b) for three California regions.

## Bay Area

a)

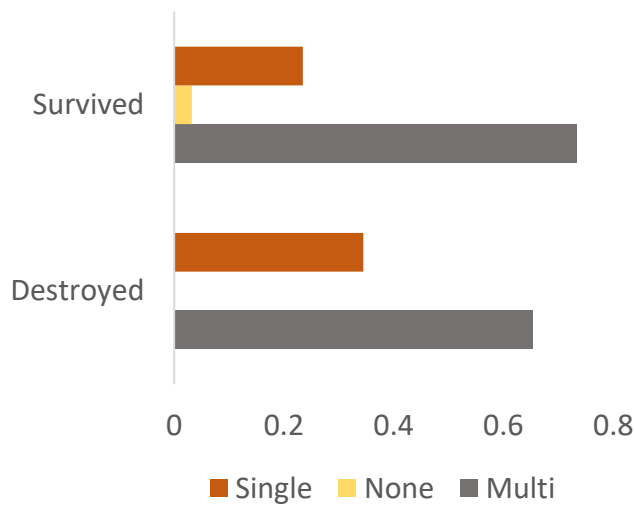

b)

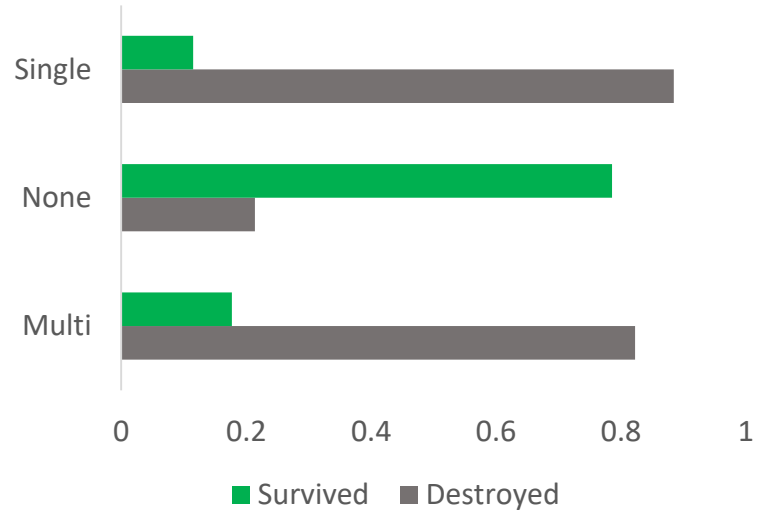

## North-Interior

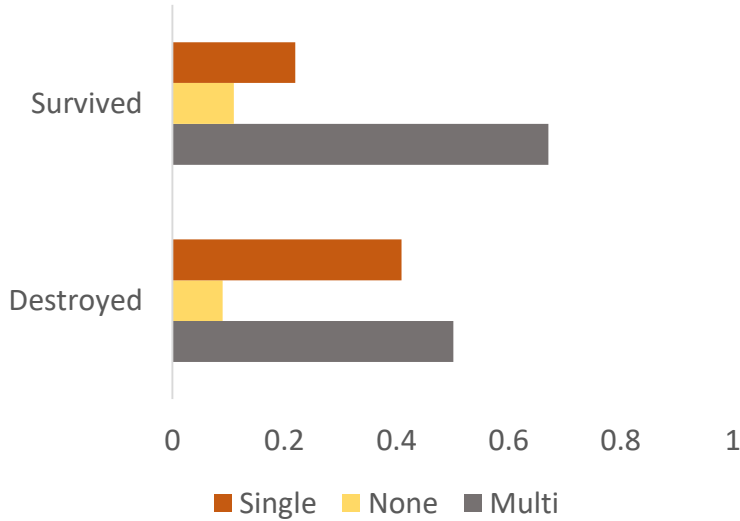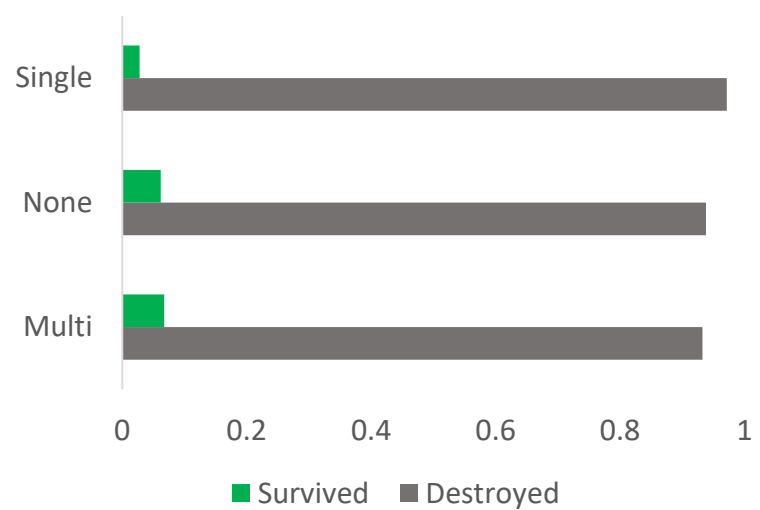

## Southern

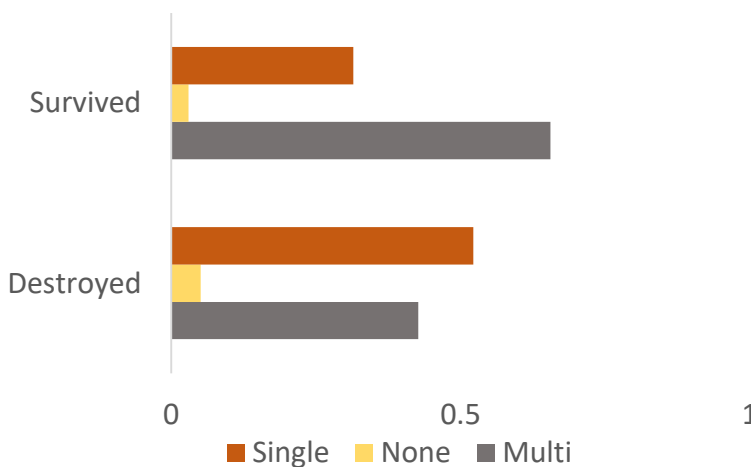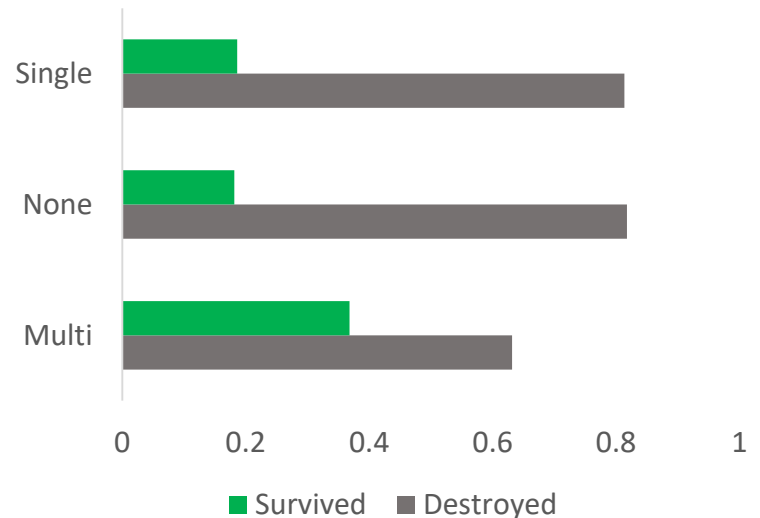

Figure S8: Proportion of windowpane type for survived and destroyed structures (a) and proportion of survived and destroyed structures within windowpane type (b) for three California regions.
